# Supplementary material for: Aberrant maturation of mutant perforin underlies the clinical diversity of hemophagocytic lymphohistiocytosis
Source: JCI journal article supplement (doi:10.1172/jci26217), 2005-12-08
Supplement: sd1 [file 1]

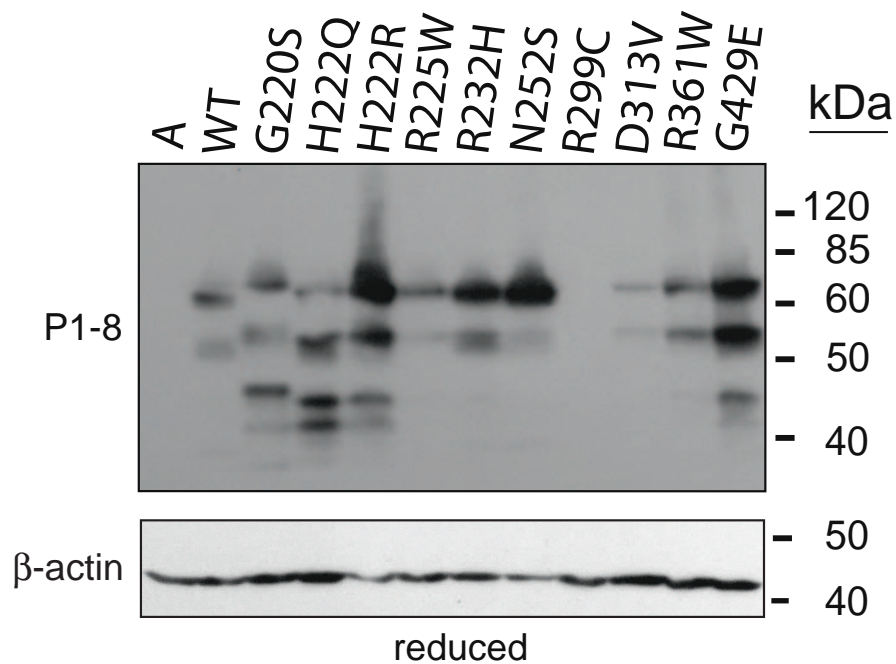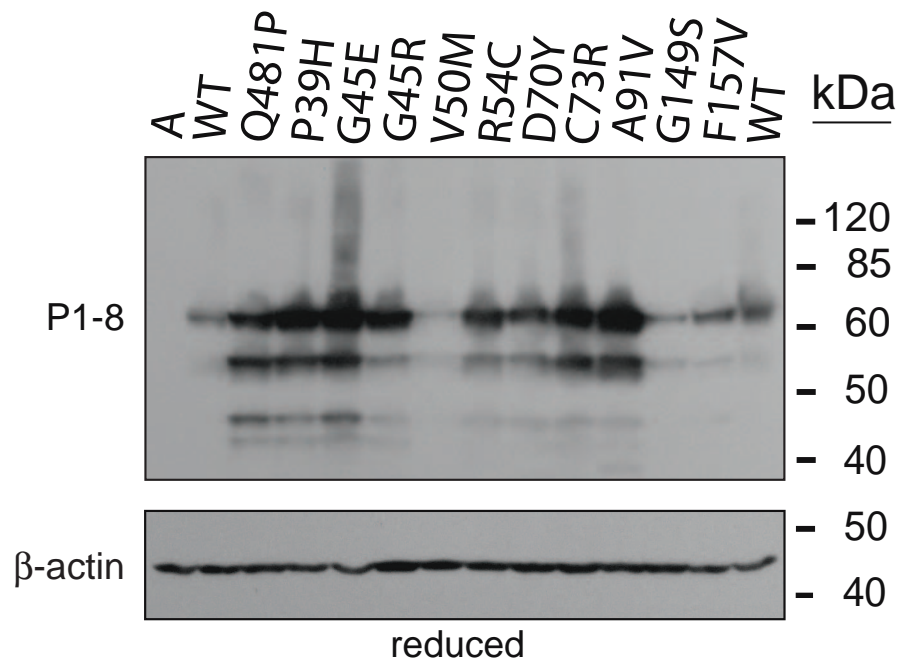

*K.Risma et al., Supplemental figure*

Expression of mutant perforin proteins in RBL-1 cells. 50  $\mu$ g of denatured cellular proteins of each transfectant was loaded on a 10% SDS-PAGE and transferred to nylon membranes and probed with antibodies against perforin (P1-8) and  $\beta$ -actin (abcam).
